# Supplementary material for: Globus pallidus dynamics reveal covert strategies for behavioral inhibition
Source: eLife journal article supplement (doi:10.7554/elife.57215), 2020-06-10

# Figure 1 - figure supplement 1

Behavioral data for all sessions and for each individual animal.

A. Proactive slowing of RT is visible in aggregate across all recorded sessions (n= 251 sessions, from 6 rats), in both left and right directions. Shading indicates SEM across rats.

B. Cumulative density plots of RT for all sessions included in electrophysiology data analysis for each rat, in the same format as Fig. 1. Left plots, comparison of Go RT and Stop-fail RT; right plots, selective proactive inhibition for movements contraversive to the recorded neurons.

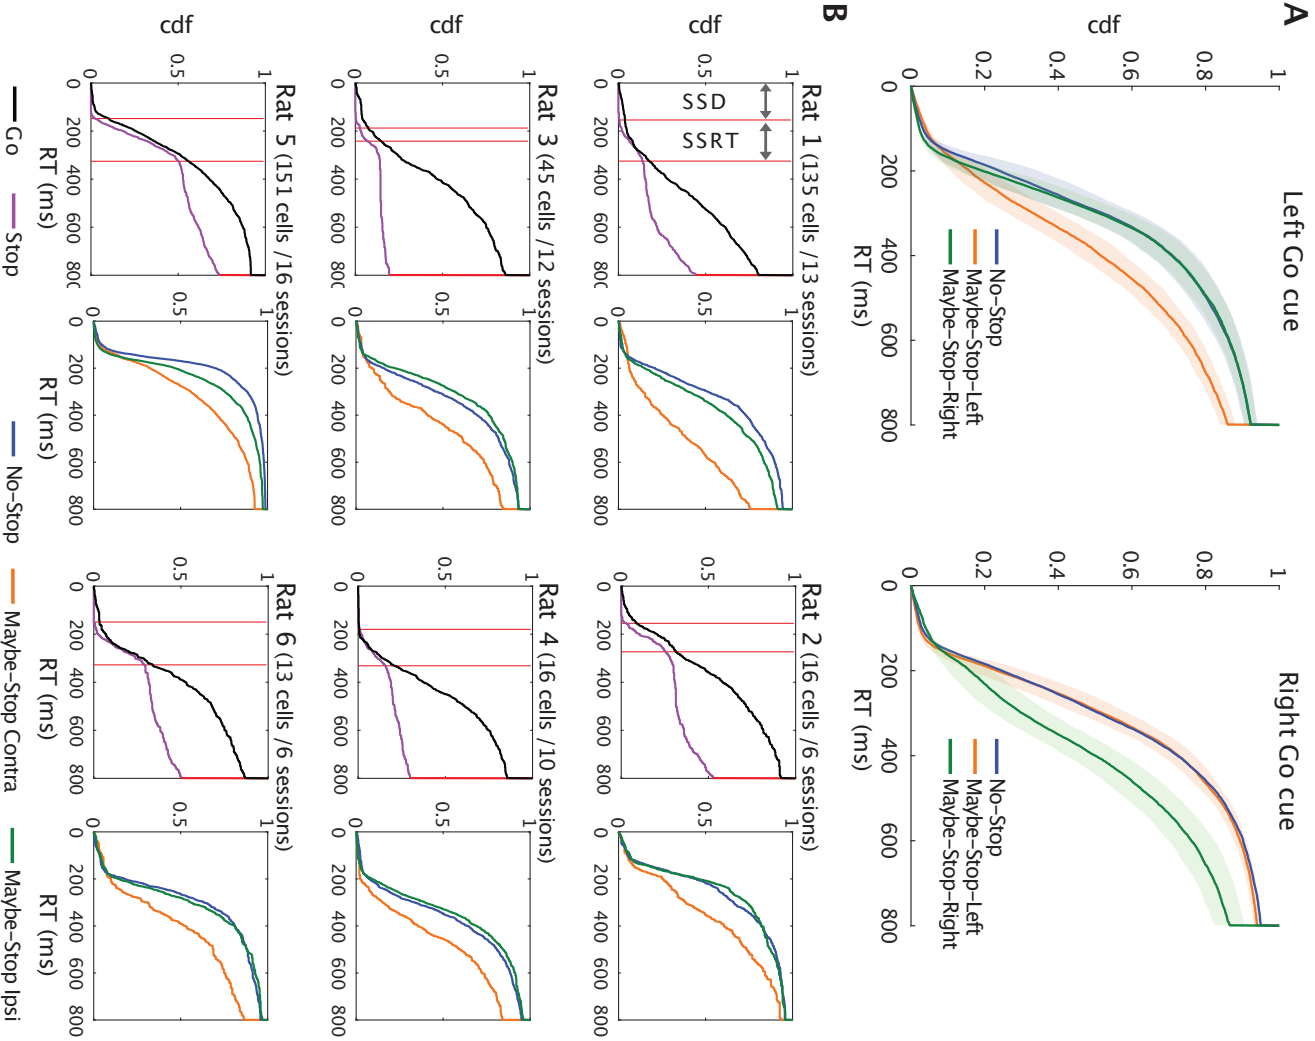

Supplement: supp [file elife_poa_e57215_Figure_1_figure_supplement_1.pdf › elife_poa_e57215_Figure_1_figure_supplement_1.pdf]
