# Supplementary material for: Globus pallidus dynamics reveal covert strategies for behavioral inhibition
Source: eLife journal article supplement (doi:10.7554/elife.57215), 2020-06-10

# Figure 2 - figure supplement 1

## Further details of GP recordings.

**A.** Estimated locations of recorded units, within coronal atlas sections (Paxinos & Watson 2006).

**B.** Firing pattern of all GP cells (n=376) on ipsi trials, shown in the same format as Fig. 2C.

**C.** Proactive effects on average GP firing. As Fig. 2F, but dividing units into those that predominantly increase or decrease firing rate.

**D.** Duration of significant difference between Maybe-Stop and No-Stop conditions, during the 500ms before Go cue), for each neuron. Most units show a significant difference at some time, but very few show sustained changes with proactive inhibition.

**E.** Comparing average GP firing on Correct contra trials and error trials (wrong choices and RT limit errors).

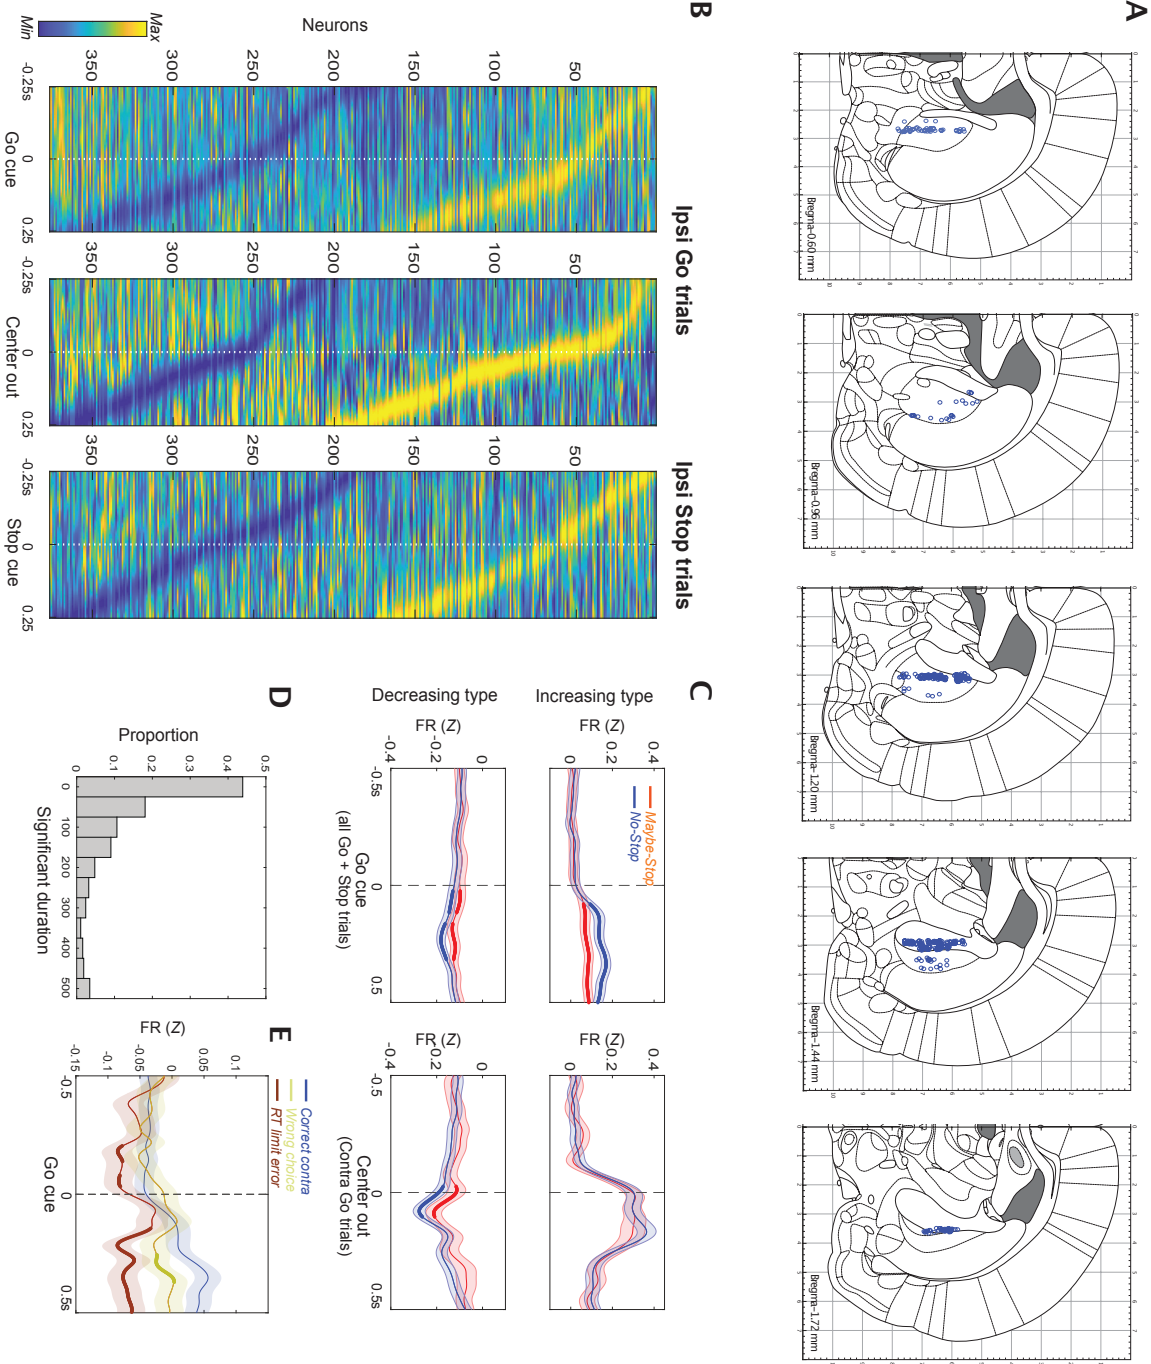

Supplement: supp [file elife_poa_e57215_Figure_2_figure_supplement_1.pdf › elife_poa_e57215_Figure_2_figure_supplement_1.pdf]
