# Supplementary material for: Globus pallidus dynamics reveal covert strategies for behavioral inhibition
Source: eLife journal article supplement (doi:10.7554/elife.57215), 2020-06-10
Supplement: supp [file elife_poa_e57215_Figure_3_figure_supplement_1.pdf › elife_poa_e57215_Figure_3_figure_supplement_1.pdf]

Figure 3 - figure supplement 1

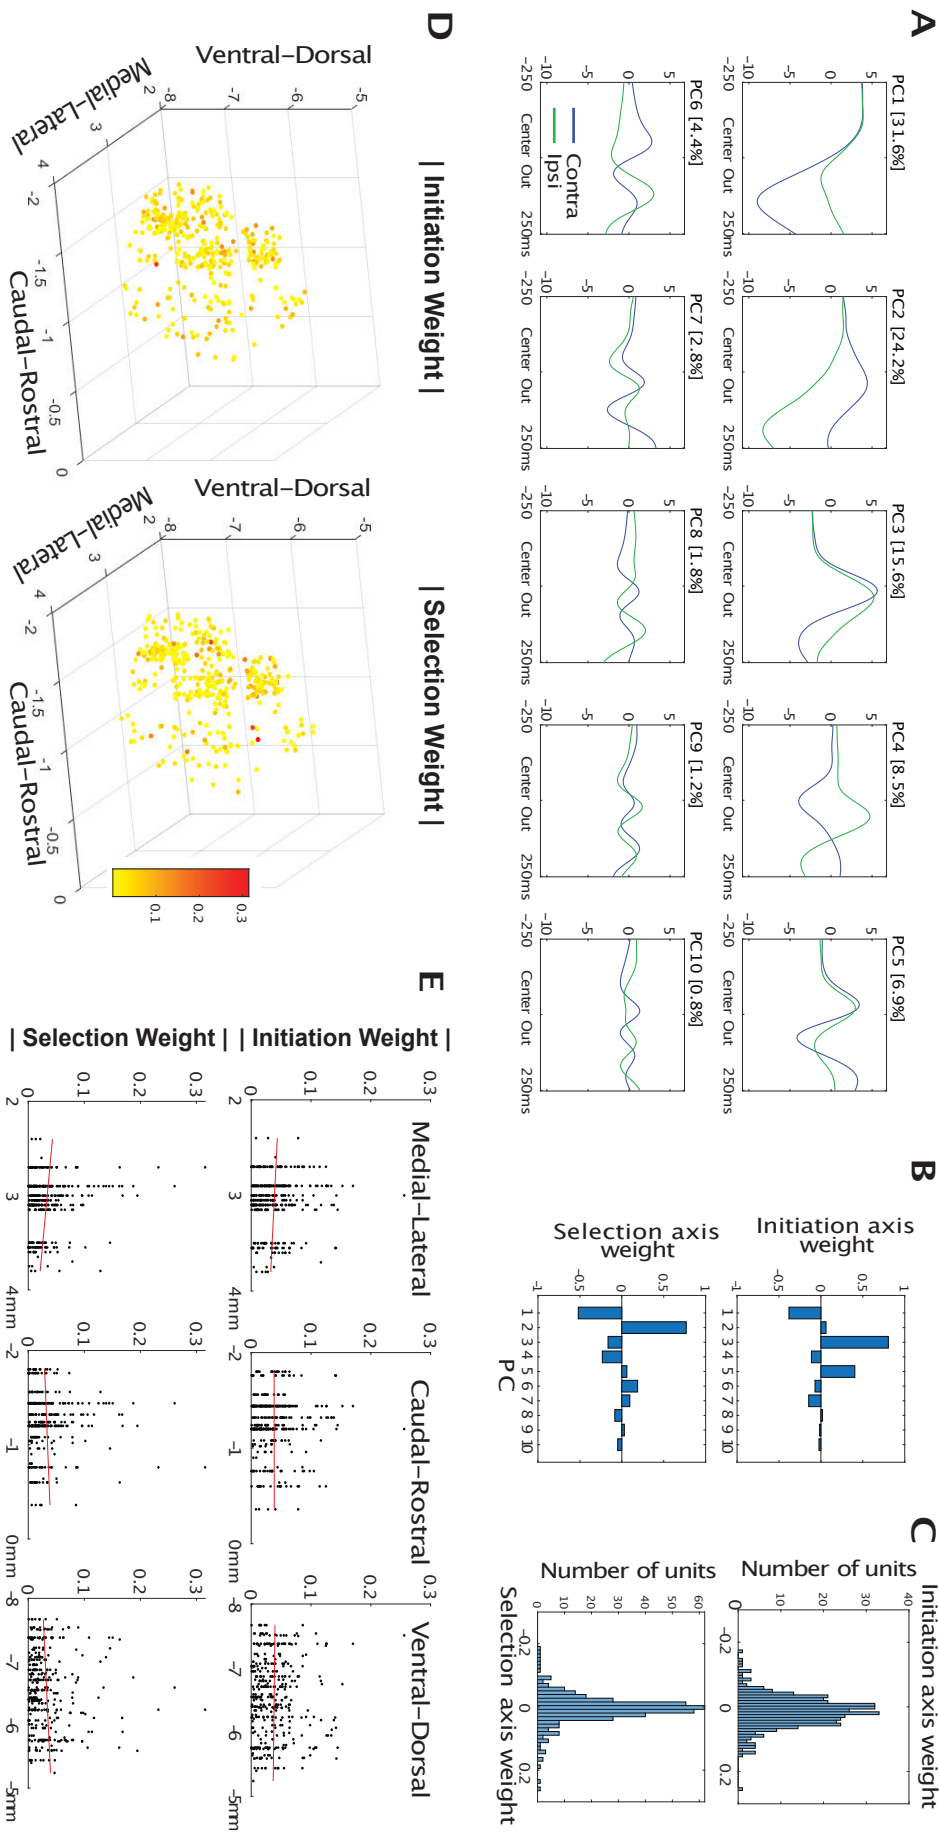

**Principal Components.**

- A. The first 10 principal components.
- B. Relative contributions of each PC to the Initiation and Selection Axes (i.e., the eigenvector of each Axis in the 10-PC space).
- C. Weight of each GP neuron on the Initiation and Selection Axis.
- D,E. Spatial arrangement of absolute weight values (positions in mm relative to bregma).
