# Supplementary material for: Globus pallidus dynamics reveal covert strategies for behavioral inhibition
Source: eLife journal article supplement (doi:10.7554/elife.57215), 2020-06-10
Supplement: supp [file elife_poa_e57215_Figure_4_figure_supplement_1.pdf › elife_poa_e57215_Figure_4_figure_supplement_1.pdf]

**Figure 4 - figure supplement 1**

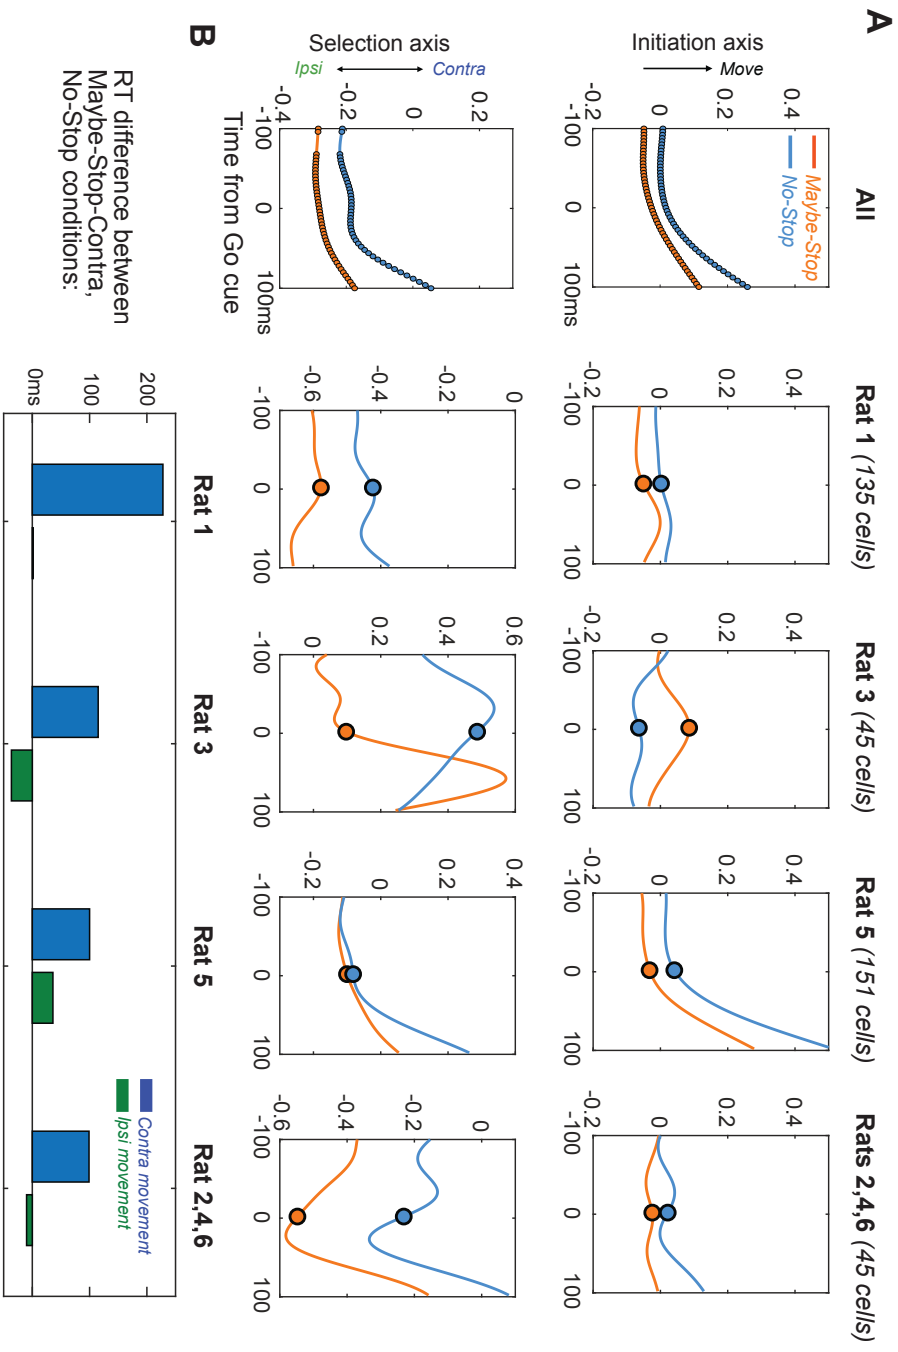

**Neural population results for individual rats, and corresponding behavior.**

**A.** Comparing proactive shifts along Initiation and Selection Axes for all rats together (left) and for individual rats. Rats 2,4 and 6 were grouped together as they had fewer recorded neurons. In all plots thicker lines indicate epochs of significant difference between two conditions (permutation test on each 4 ms time bin,  $p < 0.05$ ). Note that Rat 3 had the largest Selection Axis bias towards ipsiversive movements before the Go cue (and a bias *towards* movement on the Initiation Axis).

**B.** RT results for the same animal groupings. In all cases there was a greater slowing of contra than ipsi movements, consistent with a selective proactive inhibition effect. However, Rat 3 showed a *speeding* of ipsi movements compared to the No-Stop condition, consistent with an ipsiversive bias and no overall movement inhibition.
