# Supplementary material for: Globus pallidus dynamics reveal covert strategies for behavioral inhibition
Source: eLife journal article supplement (doi:10.7554/elife.57215), 2020-06-10

# Figure 4 - figure supplement 2

## Trial-history dependence.

**A.** (Left) On Maybe-Stop trials that followed Stop trials ("After-Stop"), rats were more likely to succeed in stopping (Wilcoxon signed rank test,  $z=2.67$ ,  $p=0.008$ ) and showed increased RT (Wilcoxon signed rank test,  $z=4.46$ ,  $p=8.02 \times 10^{-6}$ ), compared to trials that followed Go trials.

(Right) On No-Stop trials that followed error trials ("After-Error"), rats were more likely to make RT limit errors (Wilcoxon signed rank test,  $z=3.03$ ,  $p=0.002$ ) and showed increased RT (Wilcoxon signed rank test,  $z=5.42$ ,  $p=5.95 \times 10^{-8}$ ).

**B.** Corresponding apparent shifts along the Initiation Axis did not reach significance (permutation tests, analysis epoch: -100 - 0ms before Go cue).

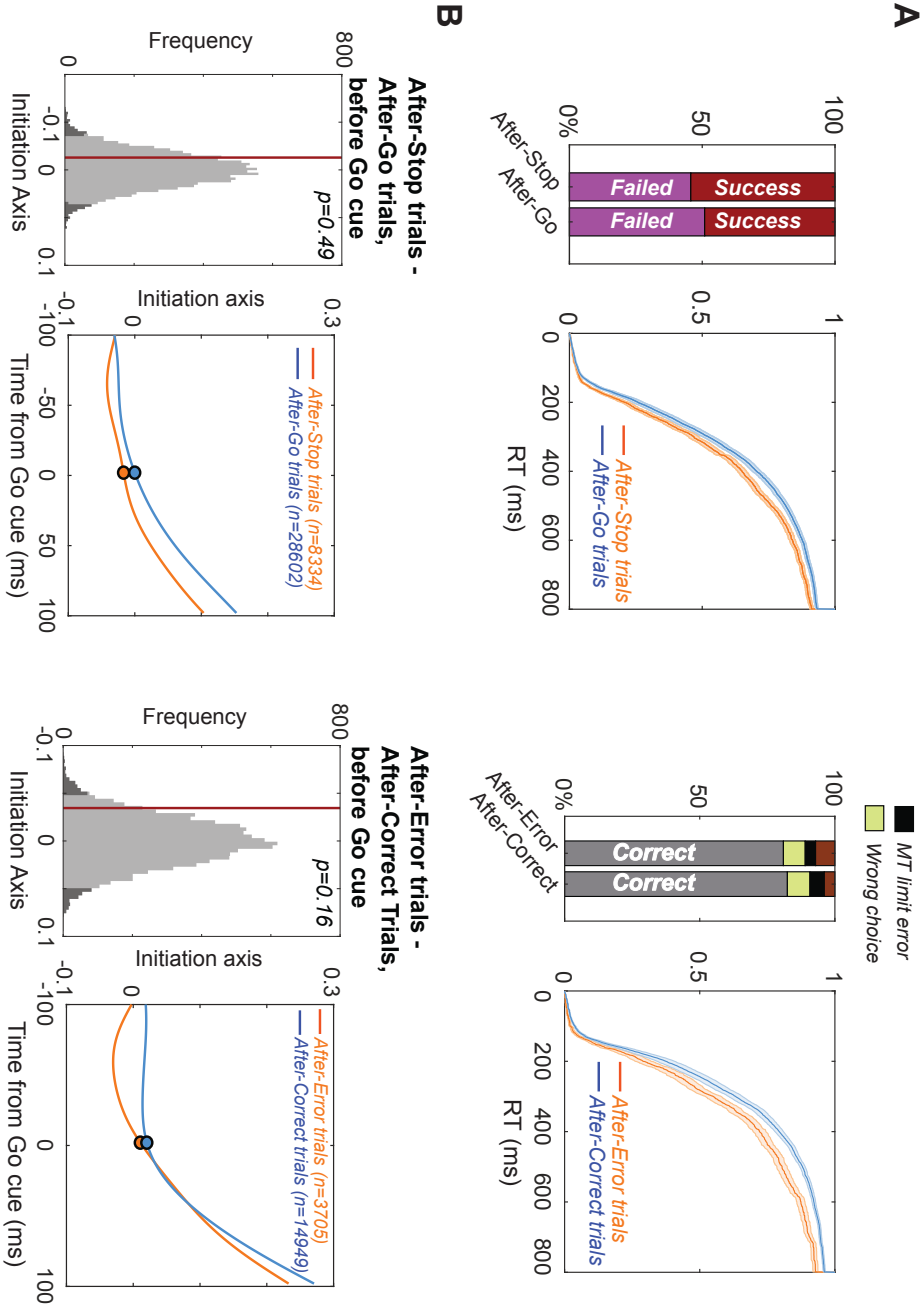

Supplement: supp [file elife_poa_e57215_Figure_4_figure_supplement_2.pdf › elife_poa_e57215_Figure_4_figure_supplement_2.pdf]
