# Supplementary material for: Globus pallidus dynamics reveal covert strategies for behavioral inhibition
Source: eLife journal article supplement (doi:10.7554/elife.57215), 2020-06-10

# Figure 5 - figure supplement 1

## Comparison of RT-matched Maybe-Stop and No-Stop trajectories.

**A-C**, same as Fig. 5 A-C but using RT-matched subsets of trials. For RT matching, each RT from the Maybe-Stop condition was paired with the closest RT from the No-Stop condition; if no pair could be found within 250ms, the trial was not used. After RT matching the mean Maybe-Stop RT was 371ms (median 370ms) and the median No-Stop RT was 369ms (median 360ms).

**D-F**, same as A-C but aligned on movement onset (Center out).

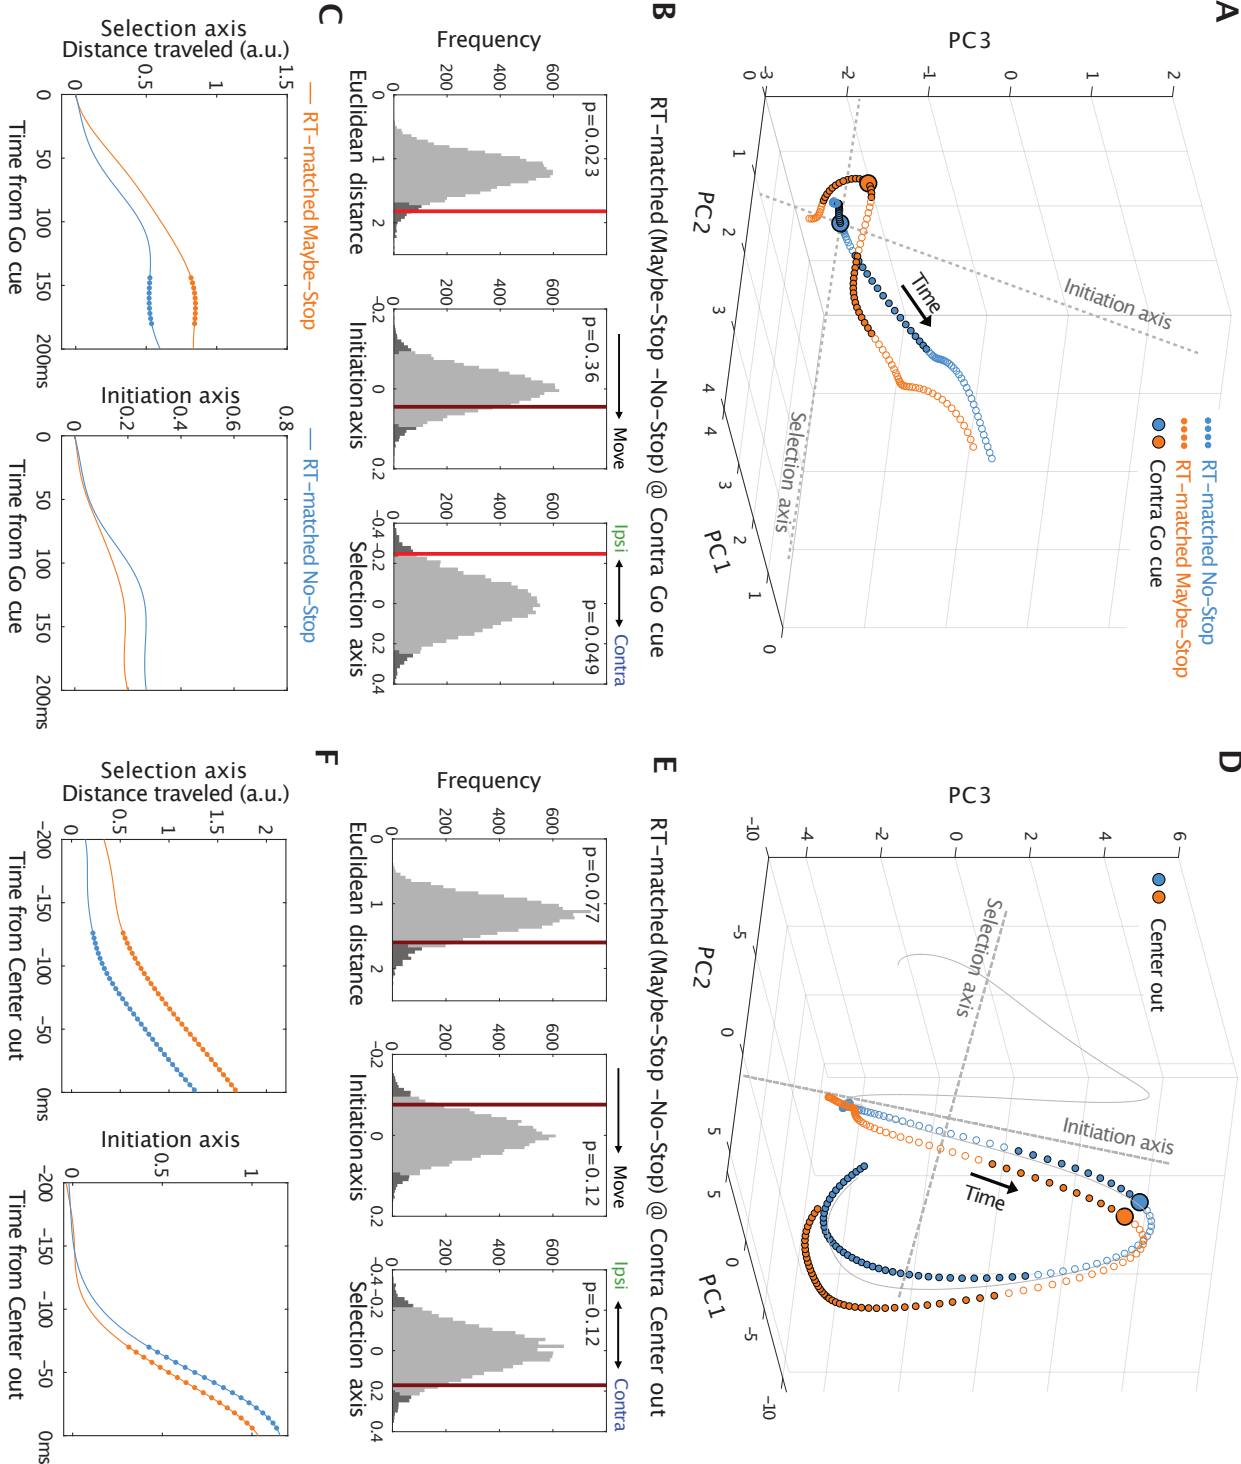

Supplement: supp [file elife_poa_e57215_Figure_5_figure_supplement_1.pdf › elife_poa_e57215_Figure_5_figure_supplement_1.pdf]
