# Supplementary material for: Globus pallidus dynamics reveal covert strategies for behavioral inhibition
Source: eLife journal article supplement (doi:10.7554/elife.57215), 2020-06-10
Supplement: supp [file elife_poa_e57215_Figure_5_figure_supplement_2.pdf › elife_poa_e57215_Figure_5_figure_supplement_2.pdf]

Figure 5 - figure supplement 2

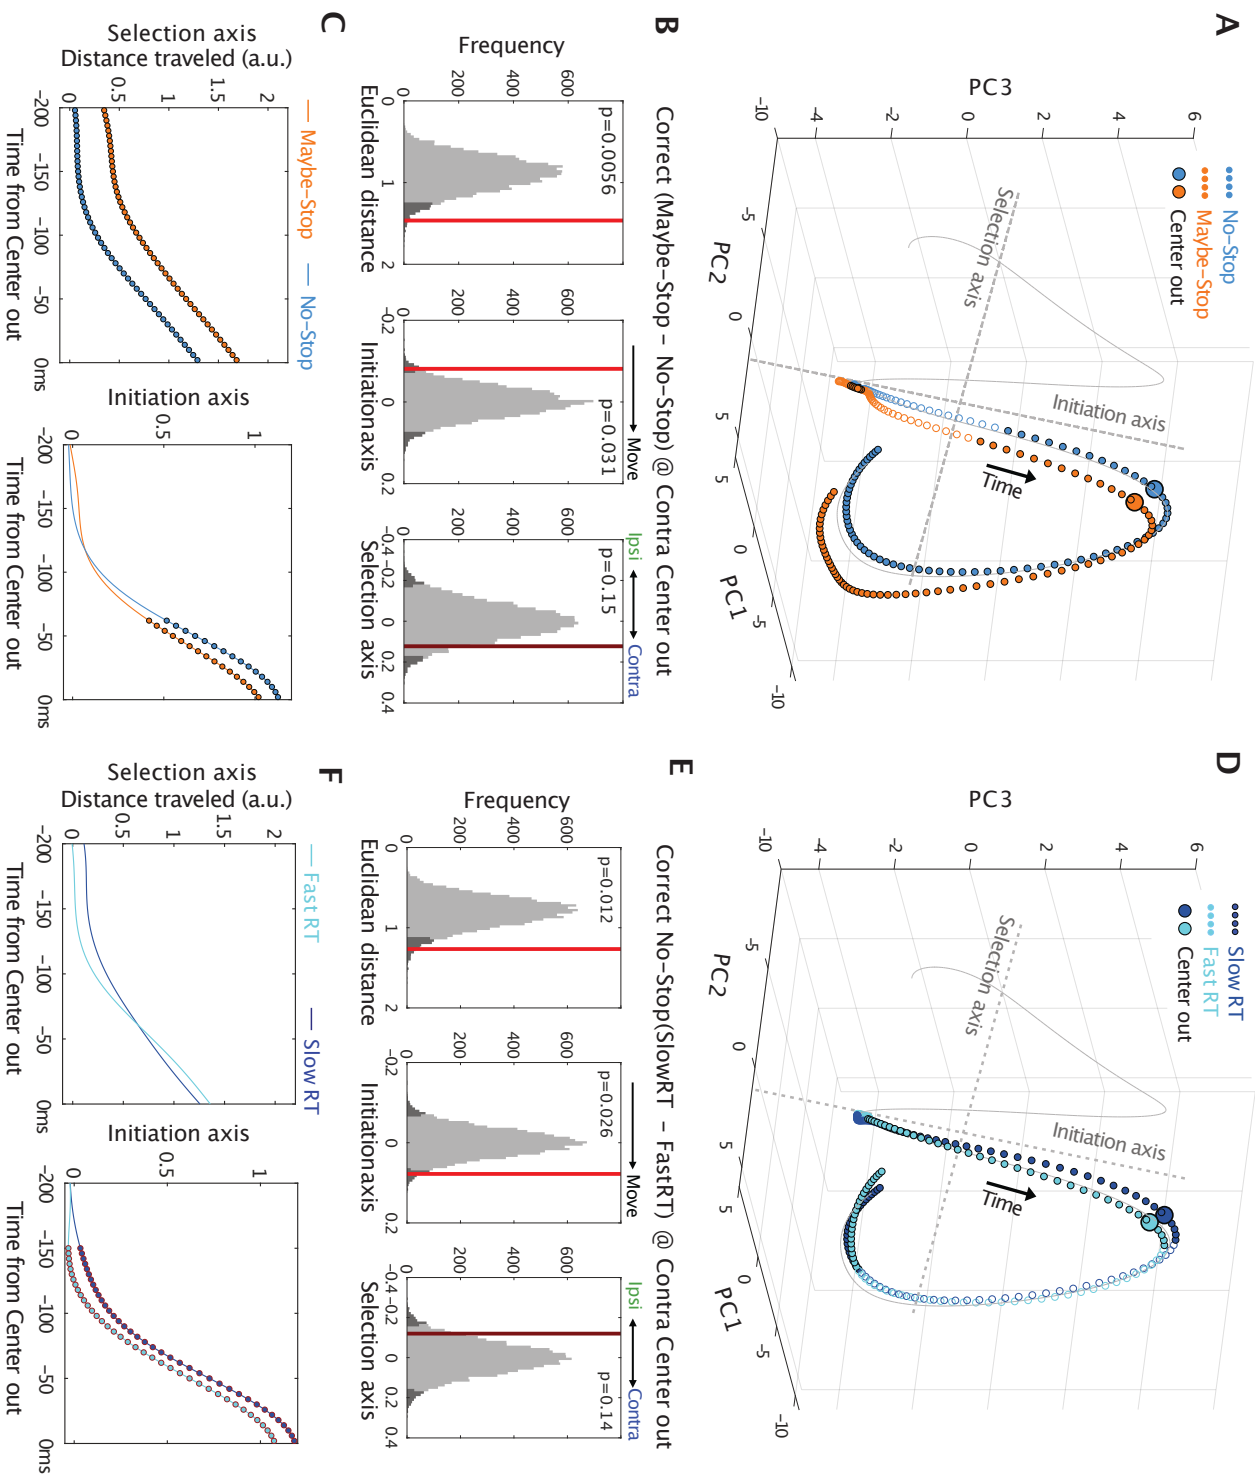

Comparison of Proactive and spontaneously Slow RT trajectories at movement onset.

All panels are as Fig. 5, but aligned on movement onset (Center out).
